# Supplementary material for: Activation of specific bitter taste receptors by olive oil phenolics and secoiridoids
Source: PubMed Central journal article supplement (PMC8595653; doi:10.1038/s41598-021-01752-y), 2021-11-16
Supplement: 41598_2021_1752_MOESM1_ESM.pdf [file 41598_2021_1752_MOESM1_ESM.pdf]

## **Activation of specific bitter taste receptors by olive oil phenolics and secoiridoids**

Meng Cui<sup>1\*</sup>, Bohan Chen<sup>1</sup>, Keman Xu<sup>1</sup>, Aimilia Rigakou<sup>2</sup>, Panagiotis Diamantakos<sup>2</sup>,  
Eleni Melliou<sup>2</sup>, Diomedes E. Logothetis<sup>1,3,4\*</sup> and Prokopios Magiatis<sup>2\*</sup>

### **Supplementary information**

<sup>1</sup>Department of Pharmaceutical Sciences, School of Pharmacy, Bouvé College of Health Sciences, Northeastern University, Boston, Massachusetts, 02115, USA

<sup>2</sup> Laboratory of Pharmacognosy and Natural Products Chemistry, Department of Pharmacy, National and Kapodistrian University of Athens, Panepistimiopolis Zografou, 15771 Athens, Greece

<sup>3</sup> Chemistry and Chemical Biology, College of Science, Northeastern University, Boston, MA 02115, USA

<sup>4</sup> Center for Drug Discovery, Northeastern University, Boston, MA 02115, USA

\* To whom correspondence should be addressed: [m.cui@northeastern.edu](mailto:m.cui@northeastern.edu) (MC);  
[d.logothetis@northeastern.edu](mailto:d.logothetis@northeastern.edu) (DEL); [magiatis@pharm.uoa.gr](mailto:magiatis@pharm.uoa.gr) (PM).

***Running title: Olive oil phenolics activate bitter taste receptors***

TAS2R1/Ligstroside aglycon

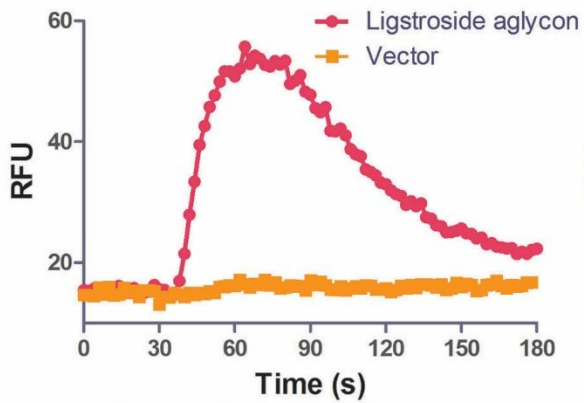

TAS2R1/Oleuropein aglycon

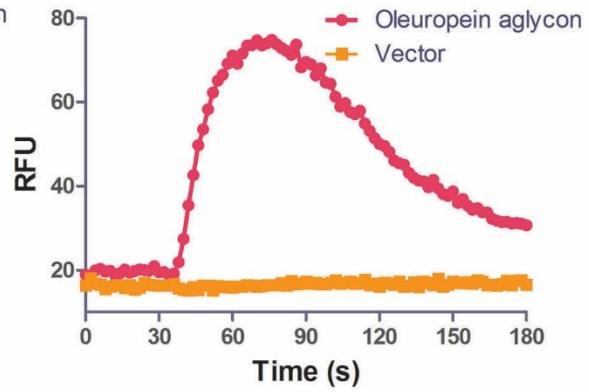

TAS2R8/Ligstroside aglycon

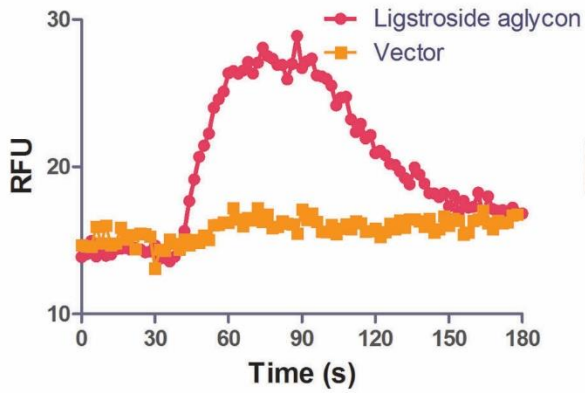

TAS2R8/Oleuropein aglycon

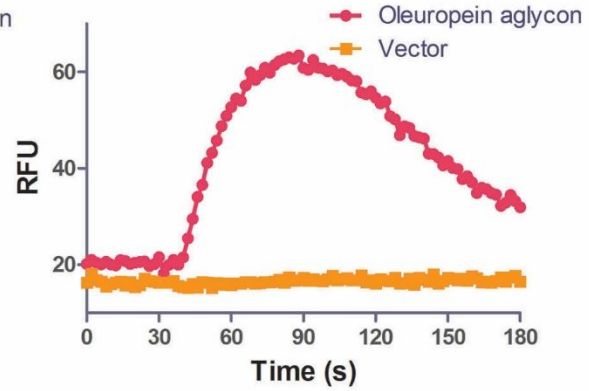

TAS2R14/Ligstroside aglycon

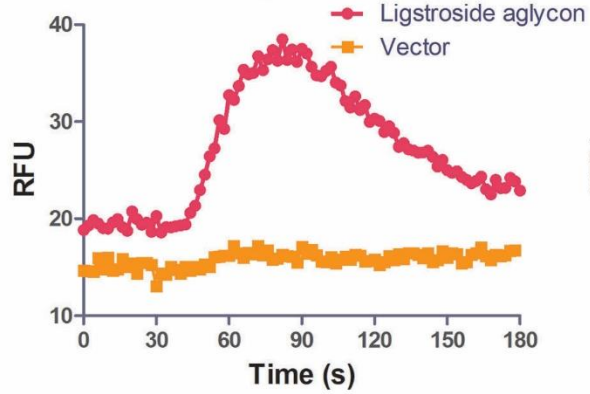

TAS2R14/Oleuropein aglycon

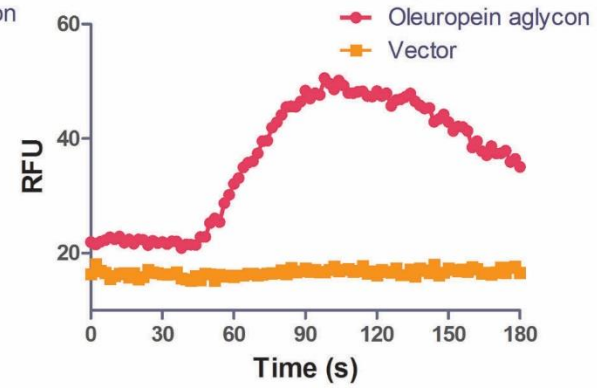

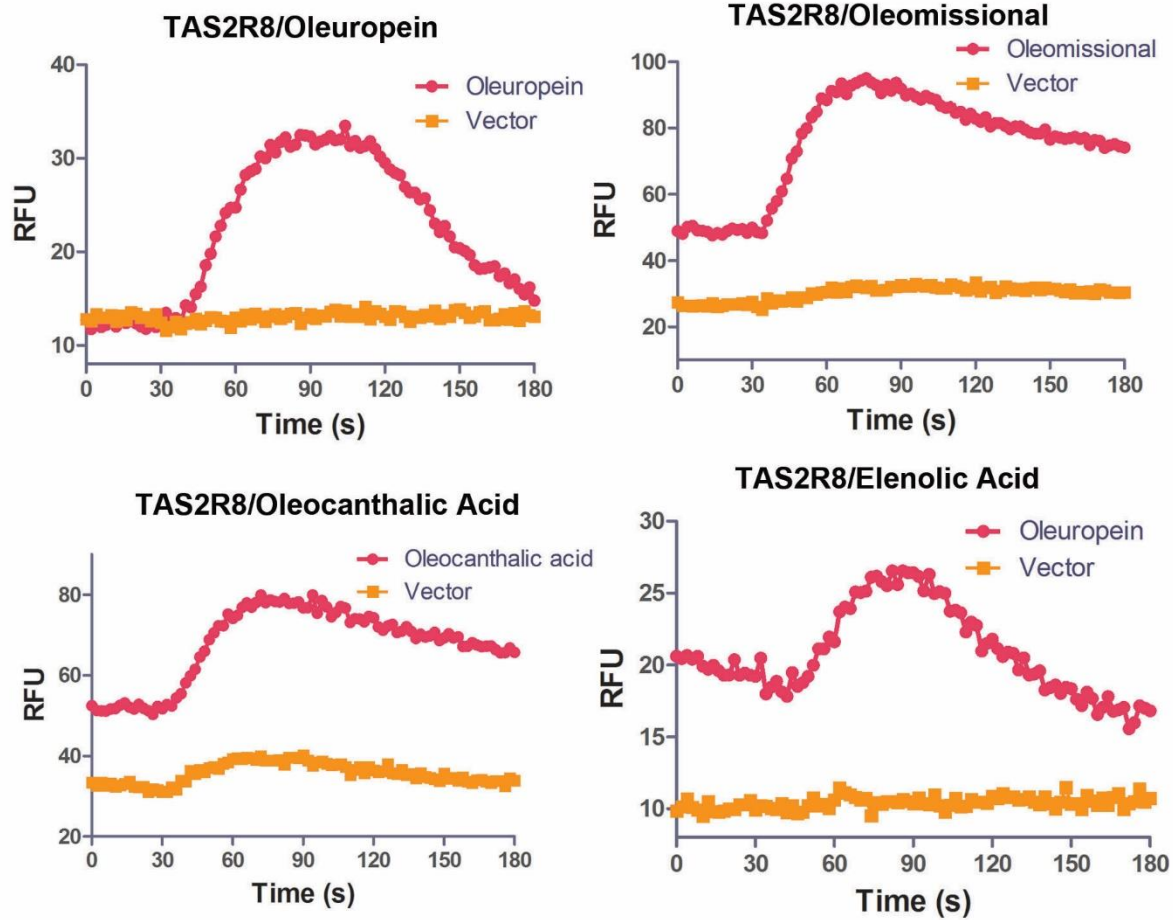

**Figure S1. Representative traces from Calcium mobilization assay.** Ligstroside aglycon [200 $\mu$ M] activates TAS2R1, TAS2R8, and TAS2R14; Oleuropein aglycon [200 $\mu$ M] activates TAS2R1, TAS2R8, and TAS2R14; Oleuropein [3mM], Oleomissional [300 $\mu$ M], Oleocanthalic acid [300 $\mu$ M], and Elenolic acid [300 $\mu$ M] activate TAS2R8. Compounds were injected at 30s, RFU: relative fluorescence units.
